# Supplementary material
Source: ML conference proceedings conference paper supplement (https://openaccess.thecvf.com/content/CVPR_2020/html/Shao_Domain_Adaptation_for_CVPR_2020_paper.html)
Supplement: Supplementary file 1 [file Shao_Domain_Adaptation_for_CVPR_2020_supplemental.pdf]

# Domain Adaptation for Image Dehazing Supplementary Materials

Yuanjie Shao<sup>1</sup>, Lerenhan Li<sup>1</sup>, Wenqi Ren<sup>2</sup>, Changxin Gao<sup>1</sup>, Nong Sang<sup>1\*</sup>

<sup>1</sup>National Key Laboratory of Science and Technology on Multispectral Information Processing,  
School of Artificial Intelligence and Automation,

Huazhong University of Science and Technology, Wuhan, China

<sup>2</sup>Institute of Information Engineering, Chinese Academy of Sciences, Beijing, China

{shaoyuanjie, lrhli, cgao, nsang}@hust.edu.cn, rwq.renwenqi@gmail.com

## 1. Additional Experimental Results

In this supplementary material, we show more experimental results compared with the state-of-the-art approaches on both synthetic and real images. As shown in Figure 1, 2 and 3, the proposed domain adaptation method performs well against the state-of-the-art algorithm, and is closer to the ground-truth. Also, we can observe that our proposed method generates cleaner images than the state-of-the-art dehazing methods in Figure 4, 5, 6, 7, 8, 9 and 10.

---

\*Corresponding author.

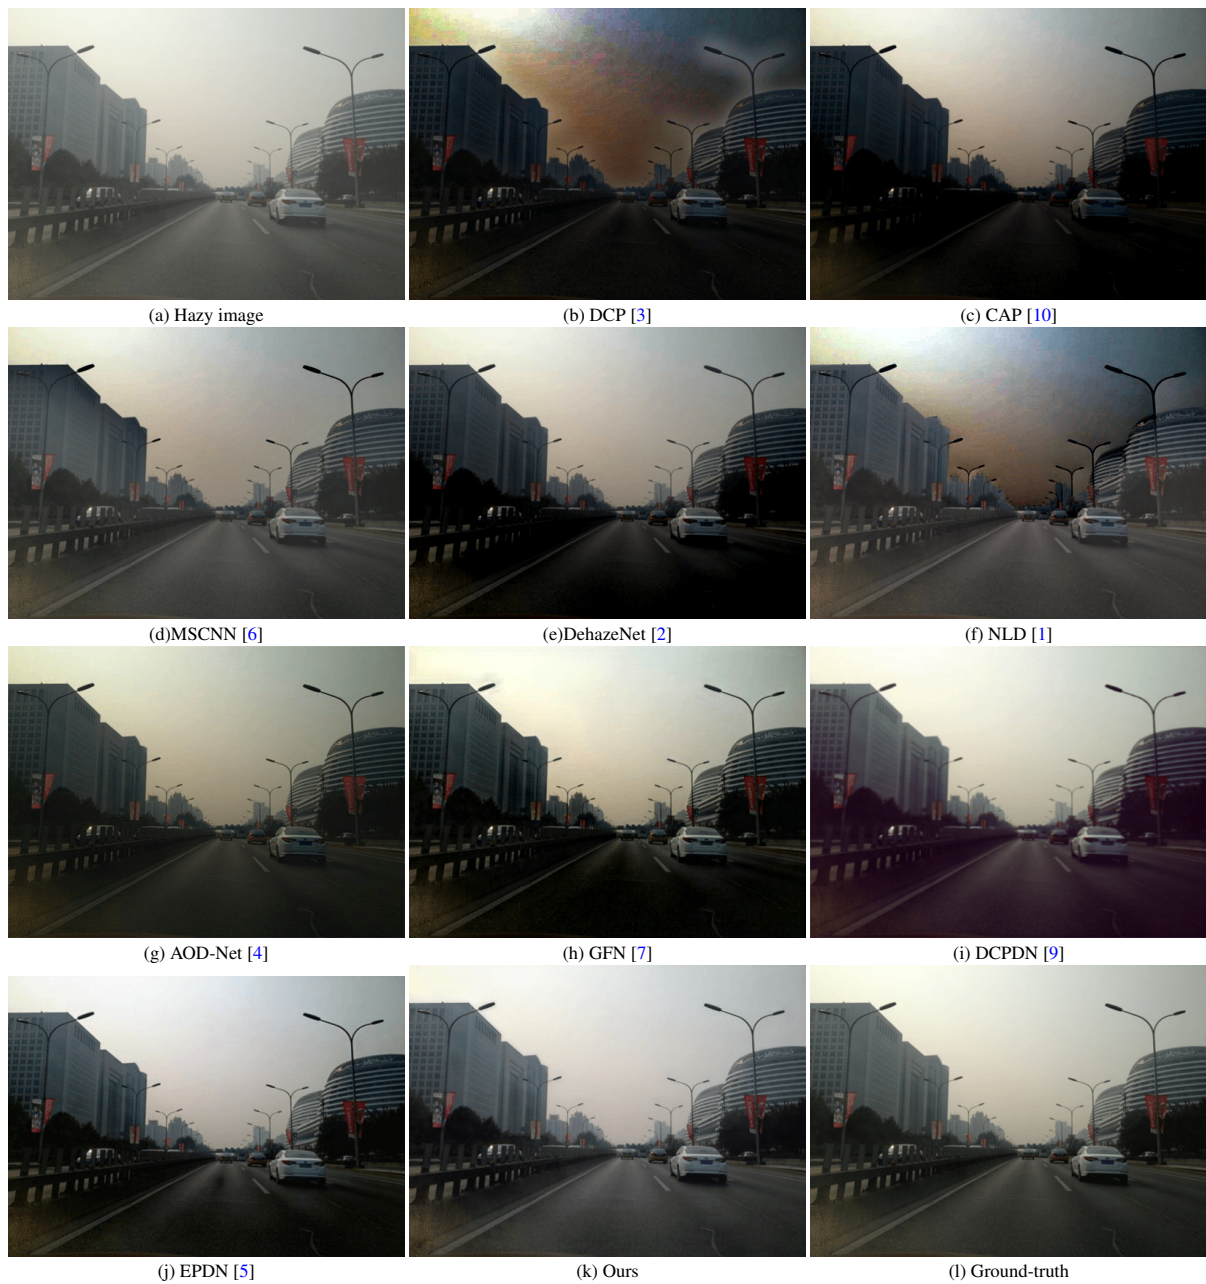

Figure 1. Visual comparisons on a hazy image from the SOTS dataset.

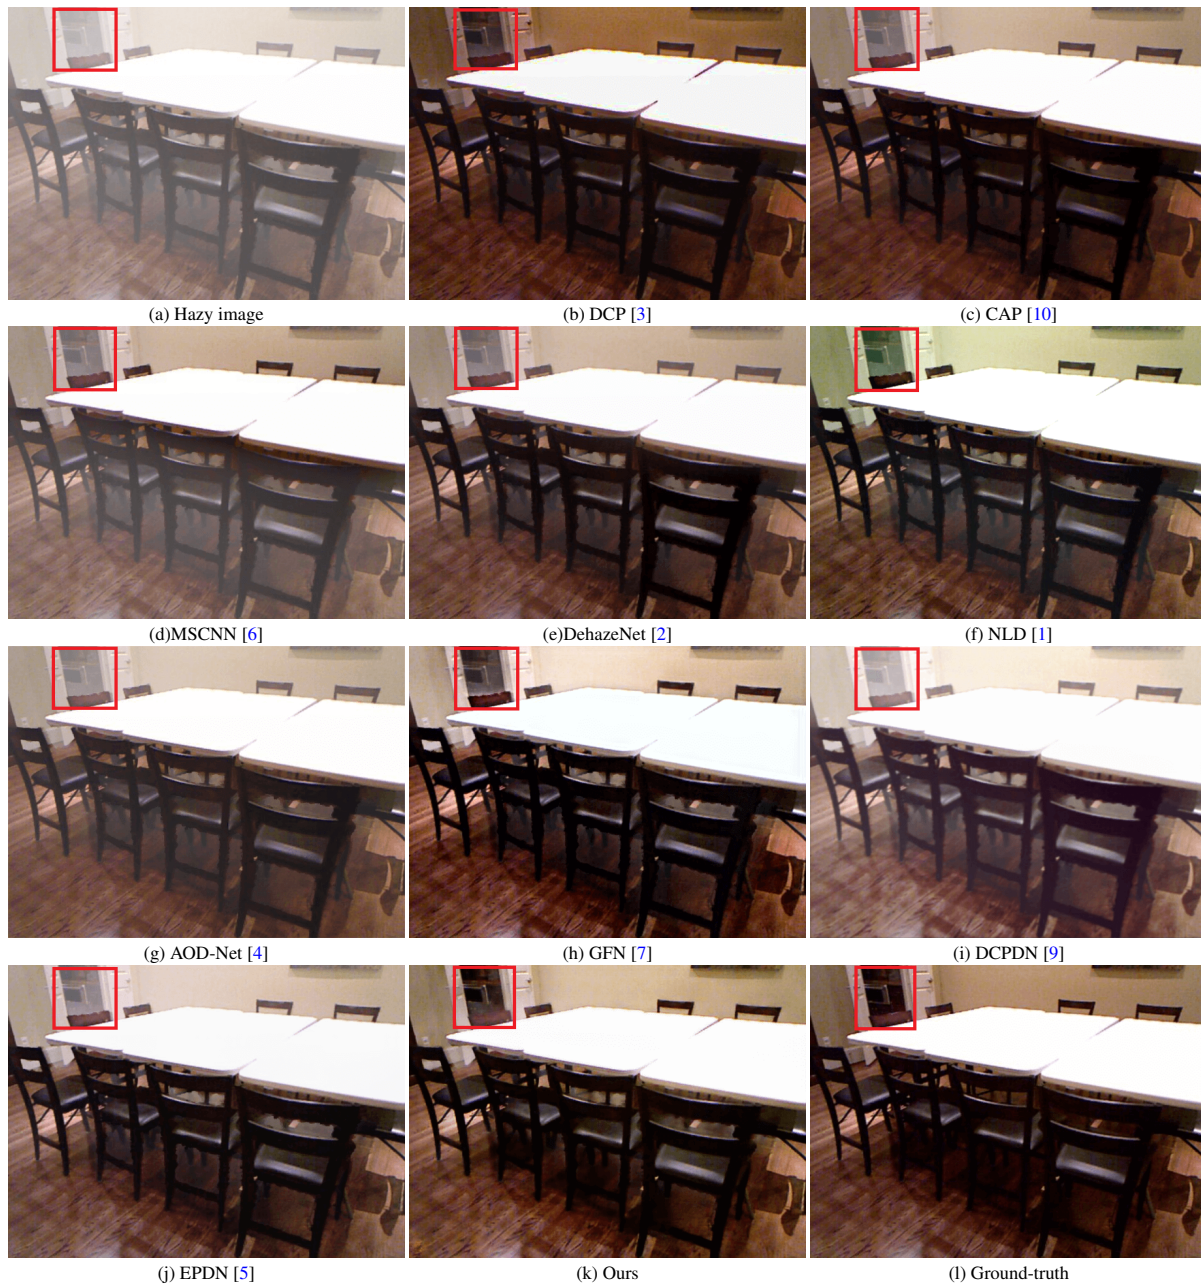

Figure 2. Visual comparisons on a hazy image from the SOTS dataset.



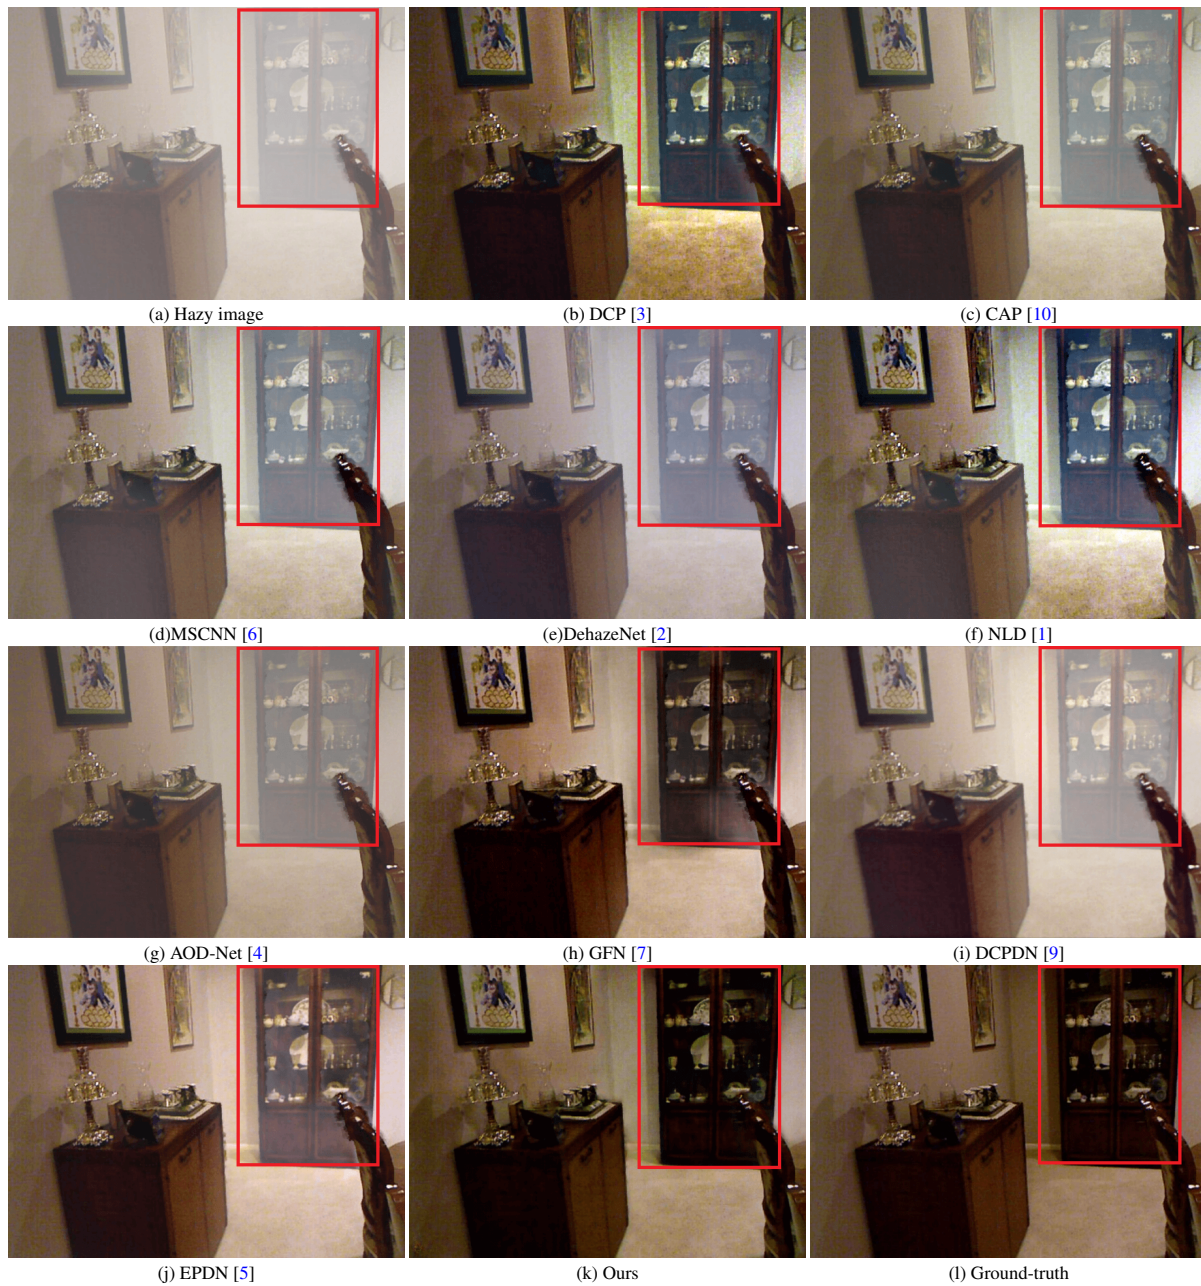

Figure 3. Visual comparisons on a hazy image from the SOTS dataset.



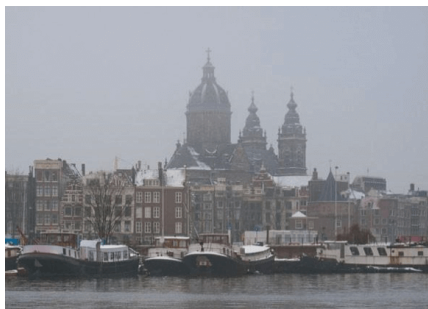

(a) Hazy image

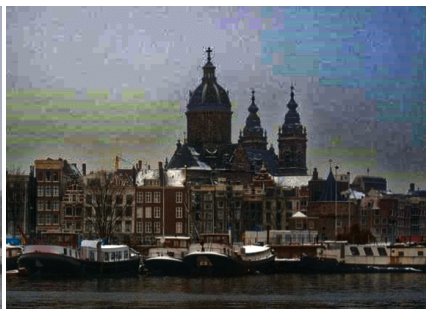

(b) DCP [3]

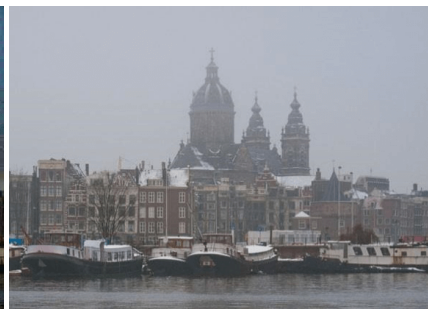

(c) CAP [10]

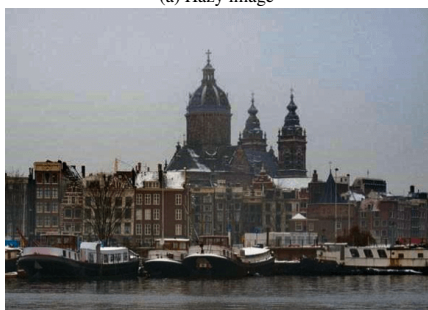

(d) MSCNN [6]

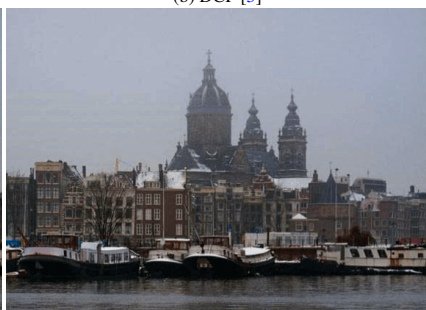

(e) DehazeNet [2]

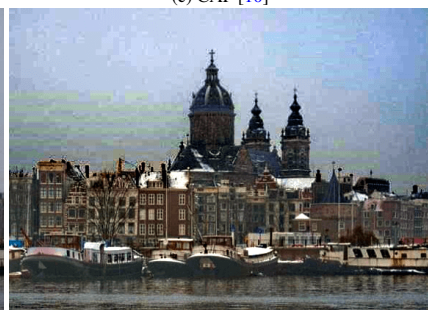

(f) NLD [1]

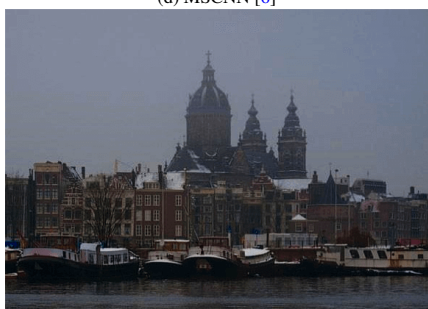

(g) AOD-Net [4]

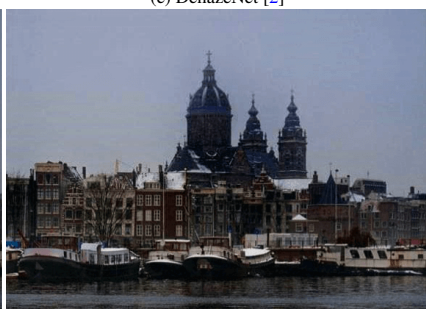

(h) GFN [7]

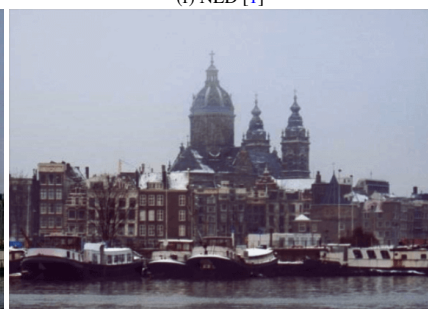

(i) DCPDN [9]

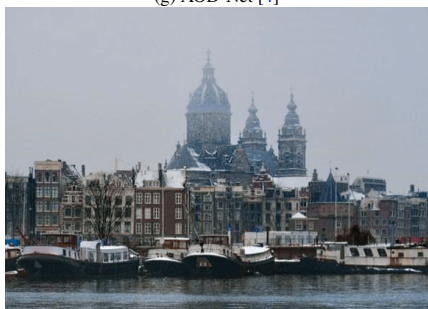

(j) PDN [8]

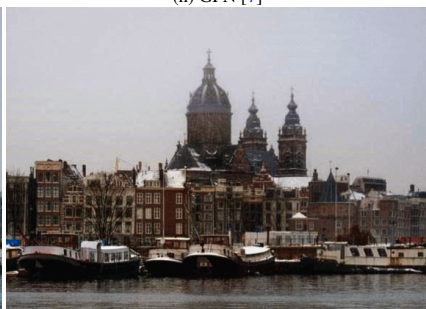

(k) EPDN [5]

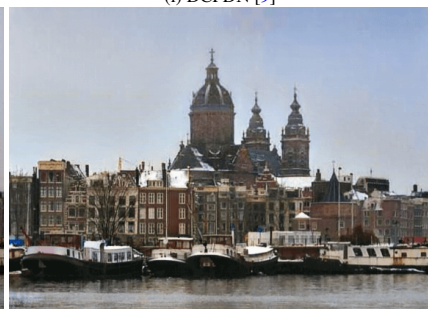

(l) Ours

Figure 4. Visual comparisons on a real-world hazy image.



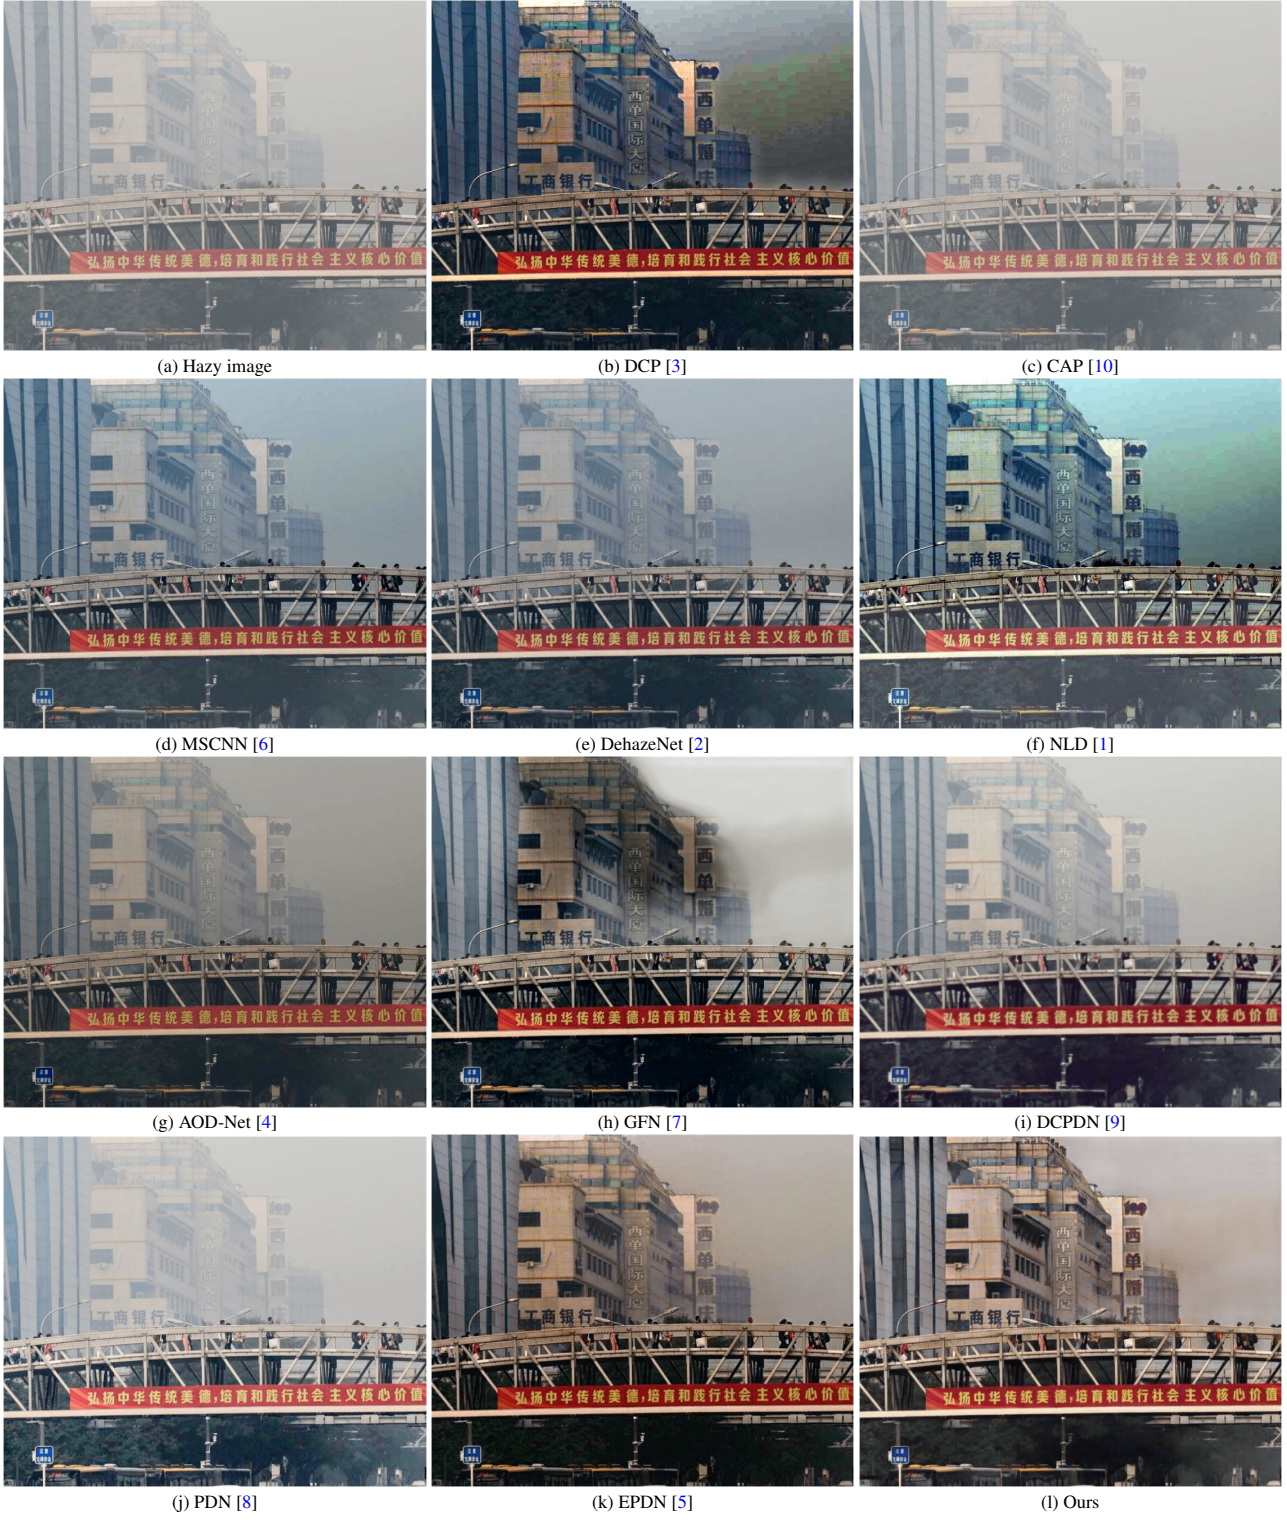

Figure 5. Visual comparisons on a real-world hazy image.



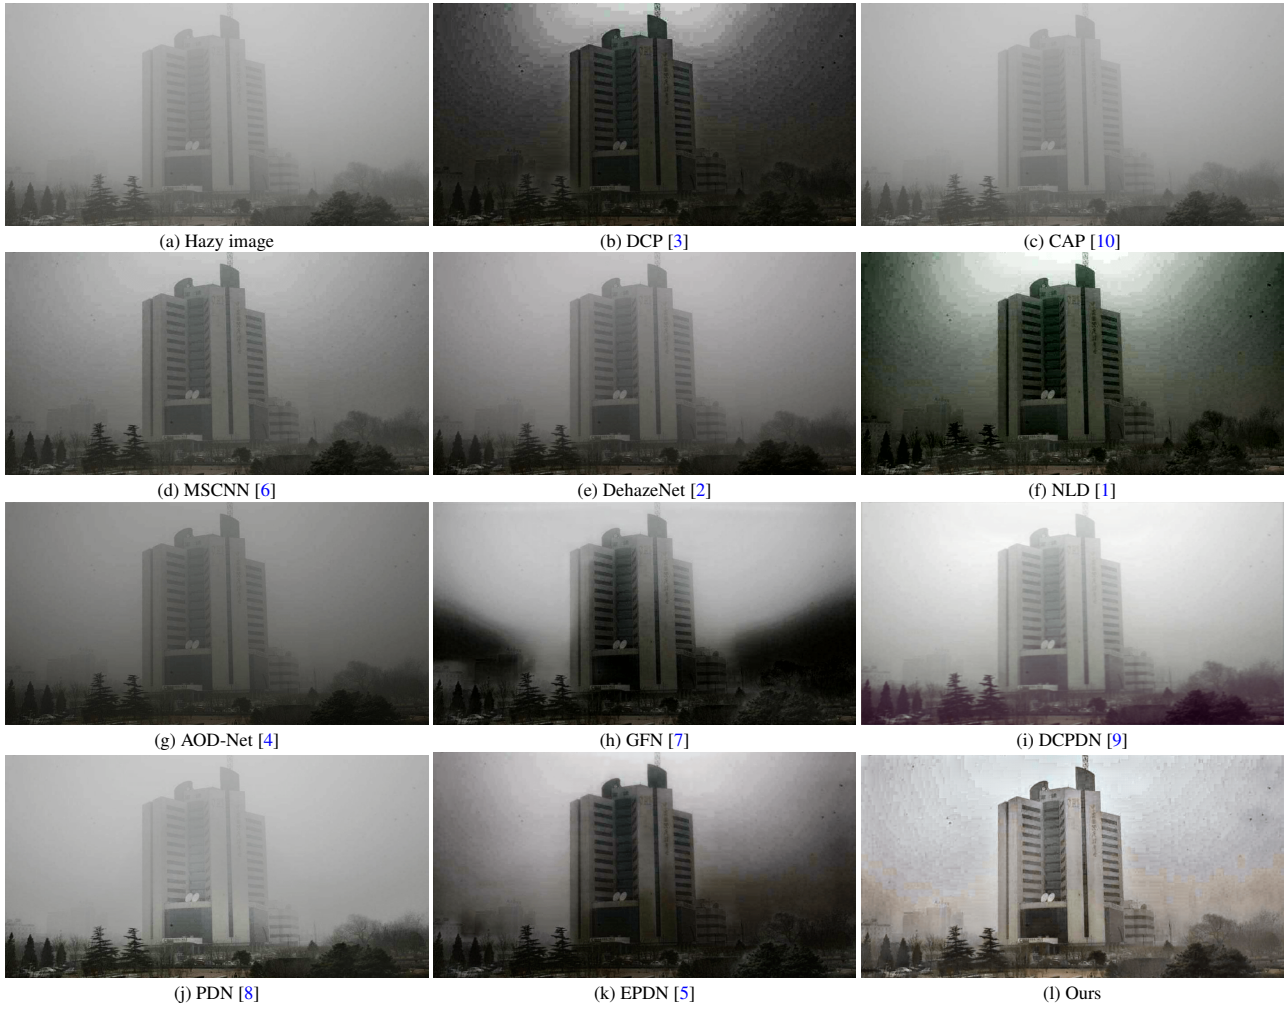

Figure 6. Visual comparisons on a real-world hazy image.

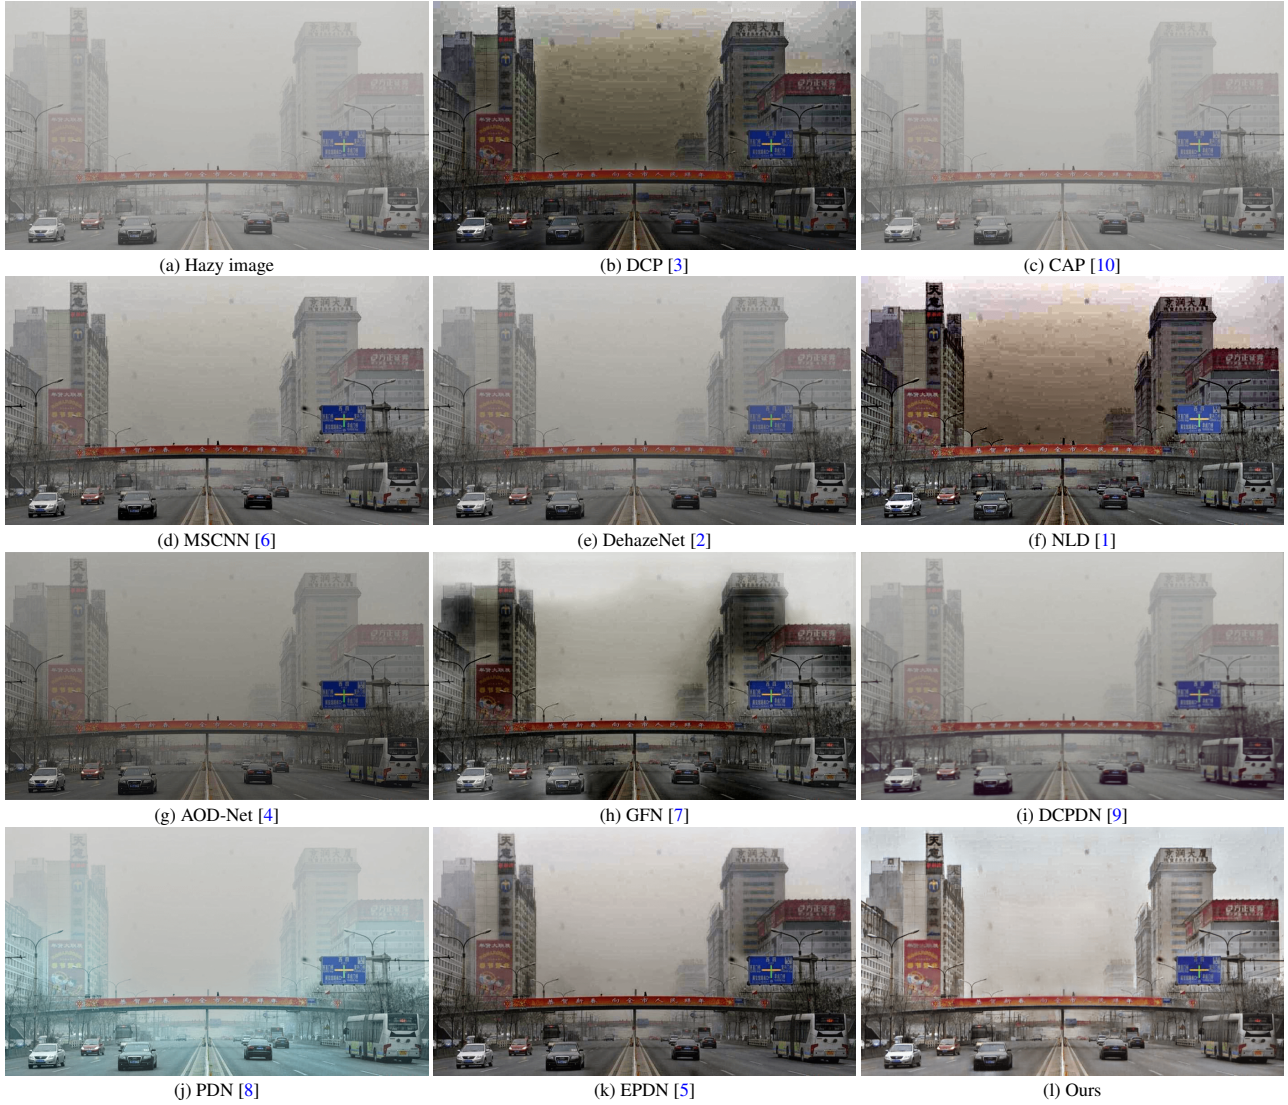

Figure 7. Visual comparisons on a real-world hazy image.



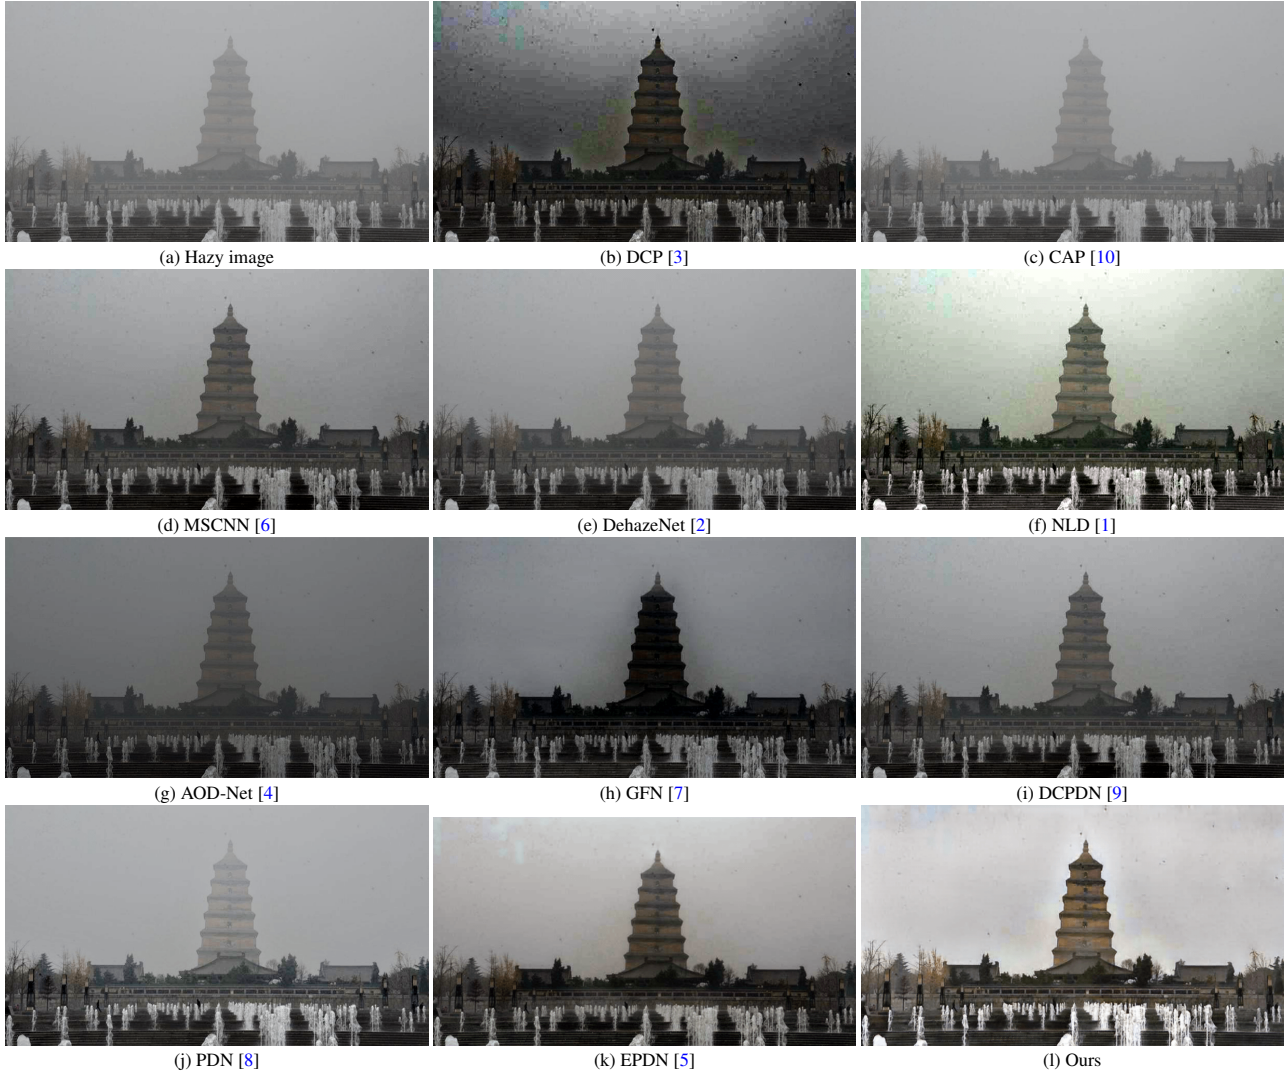

Figure 8. Visual comparisons on a real-world hazy image.

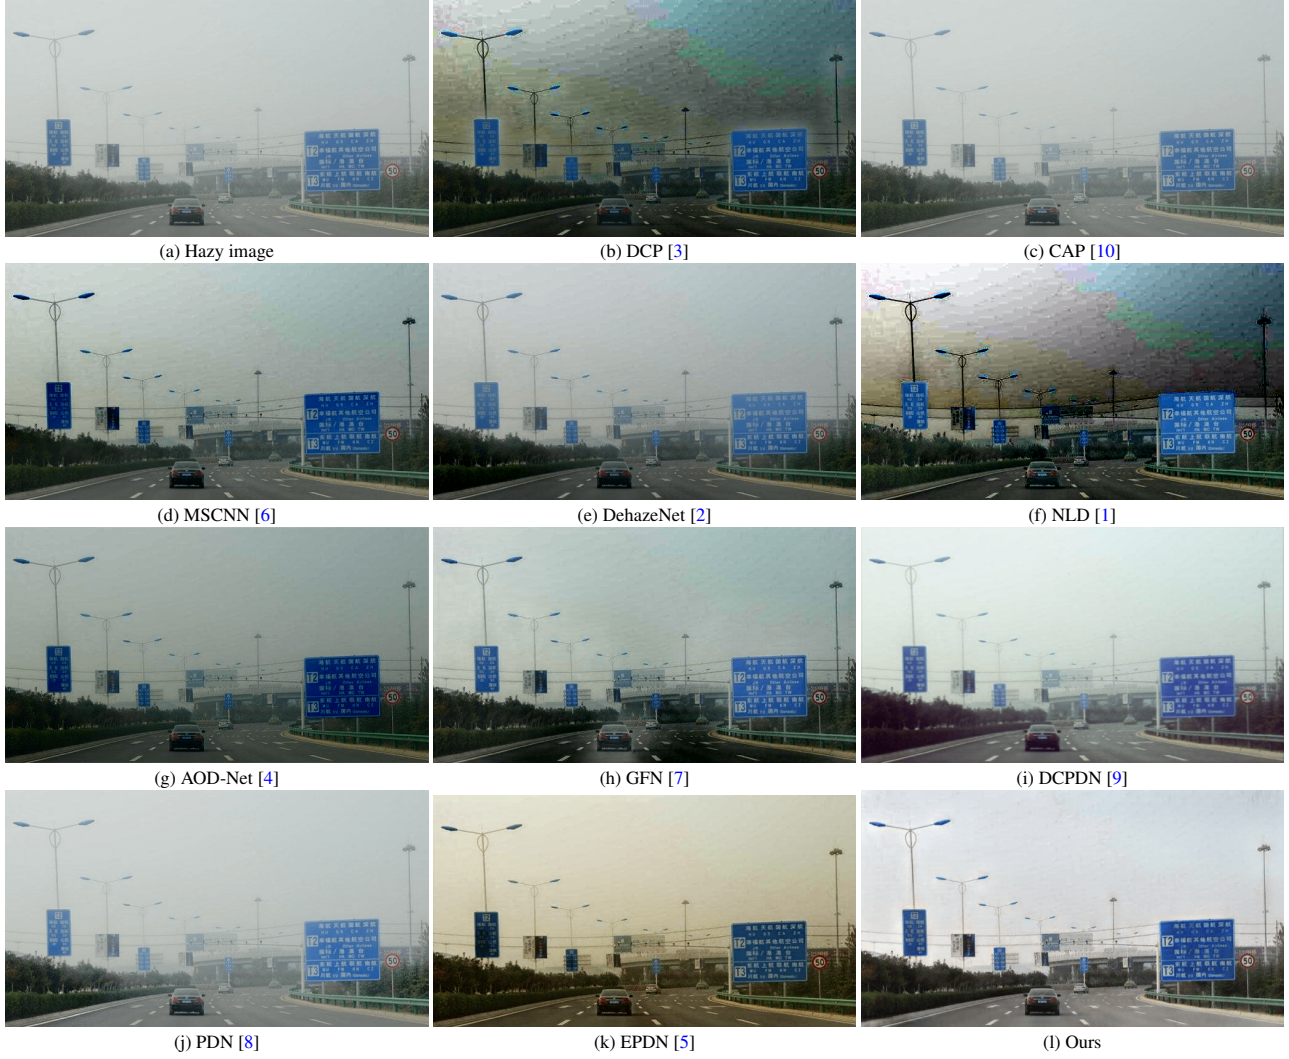

Figure 9. Visual comparisons on a real-world hazy image.



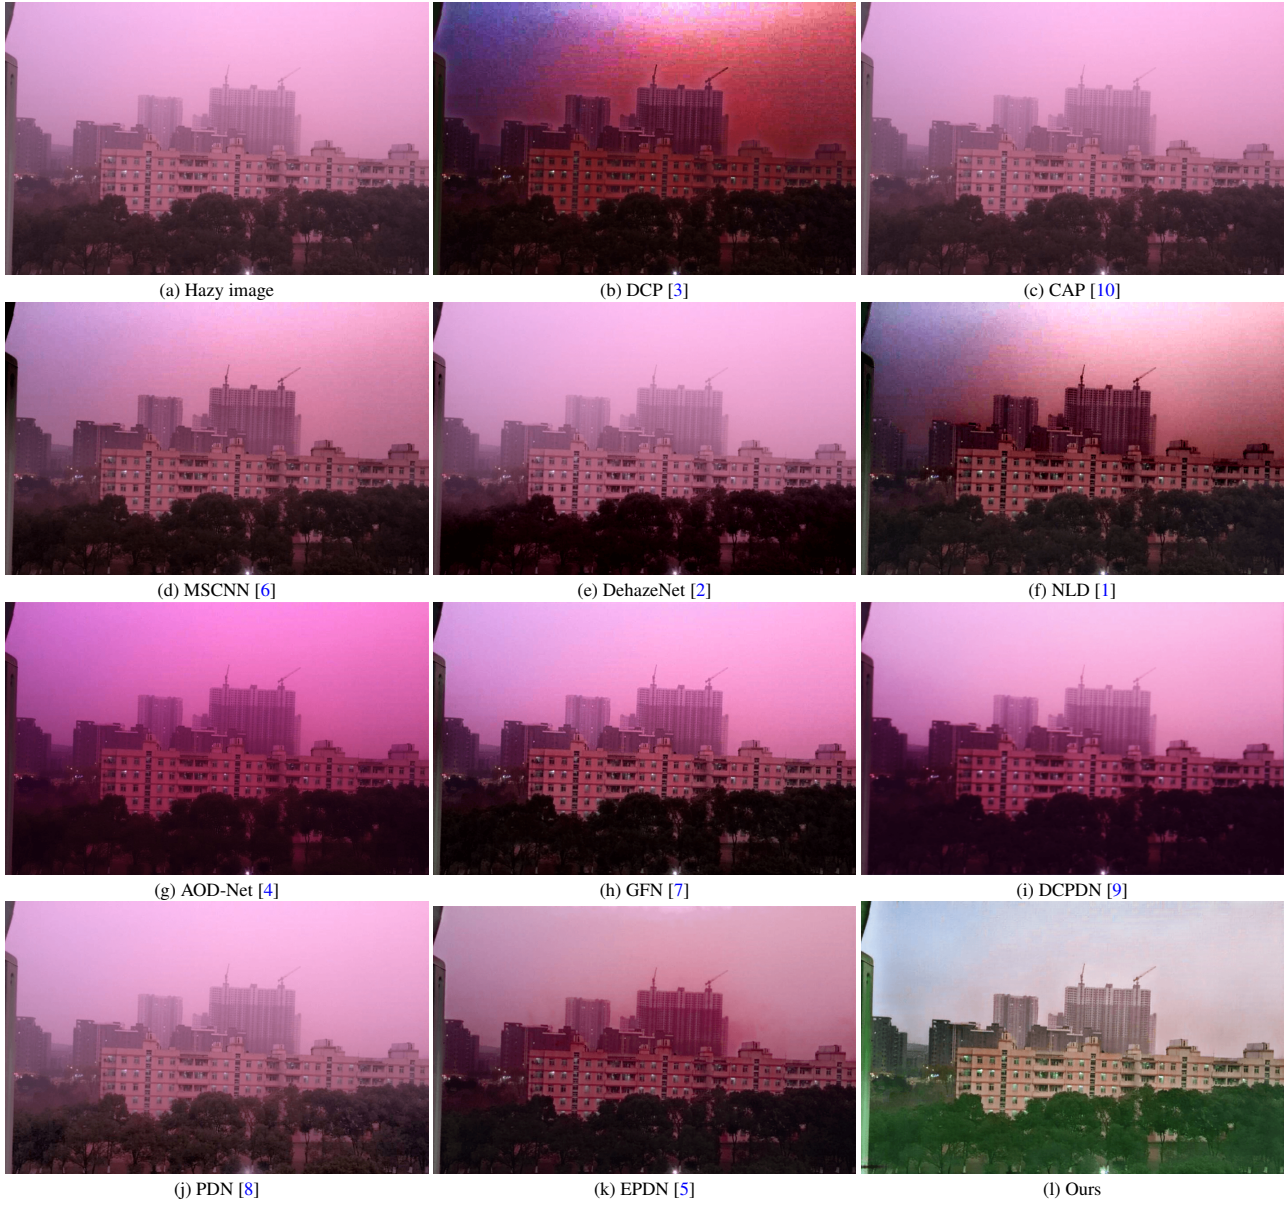

Figure 10. Visual comparisons on a real-world hazy image.

## References

- [1] Dana Berman, Shai Avidan, et al. Non-local image dehazing. In *IEEE Conference on Computer Vision and Pattern Recognition*, 2016. [2](#), [3](#), [4](#), [5](#), [6](#), [7](#), [8](#), [9](#), [10](#), [11](#)
- [2] Bolun Cai, Xiangmin Xu, Kui Jia, Qing Chunmei, and Dacheng Tao. Dehazenet: An end-to-end system for single image haze removal. *IEEE Transactions on Image Processing*, 2016. [2](#), [3](#), [4](#), [5](#), [6](#), [7](#), [8](#), [9](#), [10](#), [11](#)
- [3] Kaiming He, Jian Sun, and Xiaoou Tang. Single image haze removal using dark channel prior. *IEEE Transactions on Pattern Analysis and Machine Intelligence*, 2011. [2](#), [3](#), [4](#), [5](#), [6](#), [7](#), [8](#), [9](#), [10](#), [11](#)
- [4] Boyi Li, Xiulian Peng, Zhangyang Wang, Jizheng Xu, and Dan Feng. Aod-net: All-in-one dehazing network. In *IEEE International Conference on Computer Vision*, 2017. [2](#), [3](#), [4](#), [5](#), [6](#), [7](#), [8](#), [9](#), [10](#), [11](#)
- [5] Yanyun Qu, Yizi Chen, Jingying Huang, and Yuan Xie. Enhanced pix2pix dehazing network. In *IEEE Conference on Computer Vision and Pattern Recognition*, 2019. [2](#), [3](#), [4](#), [5](#), [6](#), [7](#), [8](#), [9](#), [10](#), [11](#)
- [6] Wenqi Ren, Si Liu, Hua Zhang, Jinshan Pan, Xiaochun Cao, and Ming-Hsuan Yang. Single image dehazing via multi-scale convolutional neural networks. In *European Conference on Computer Vision*, 2016. [2](#), [3](#), [4](#), [5](#), [6](#), [7](#), [8](#), [9](#), [10](#), [11](#)
- [7] Wenqi Ren, Lin Ma, Jiawei Zhang, Jinshan Pan, Xiaochun Cao, Wei Liu, and Ming-Hsuan Yang. Gated fusion network for single image dehazing. In *IEEE Conference on Computer Vision and Pattern Recognition*, 2018. [2](#), [3](#), [4](#), [5](#), [6](#), [7](#), [8](#), [9](#), [10](#), [11](#)
- [8] Dong Yang and Jian Sun. Proximal dehaze-net: A prior learning-based deep network for single image dehazing. In *European Conference on Computer Vision*, 2018. [5](#), [6](#), [7](#), [8](#), [9](#), [10](#), [11](#)
- [9] He Zhang and Vishal M. Patel. Densely connected pyramid dehazing network. In *IEEE Conference on Computer Vision and Pattern Recognition*, 2018. [2](#), [3](#), [4](#), [5](#), [6](#), [7](#), [8](#), [9](#), [10](#), [11](#)
- [10] Qingsong Zhu, Jiaming Mai, Ling Shao, et al. A fast single image haze removal algorithm using color attenuation prior. *IEEE Transactions on Image Processing*, 2015. [2](#), [3](#), [4](#), [5](#), [6](#), [7](#), [8](#), [9](#), [10](#), [11](#)
